# Supplementary material
Source: PubMed Central journal article supplement (PMC4400183)
Supplement: NIHMS626596-supplement-Supp_TableS1-S7.pdf [file NIHMS626596-supplement-Supp_TableS1-S7.pdf]

**Table S1.** Covariate balance by combination oral contraceptive use within decile rank for exposure 12 - > 4 months before conception

| Covariate                         | Propensity score decile rank   |      |                                |      |                                |      |                                |      |                                |      |                                |      |                                |      |                                |      |                                |      |                                |      |
|-----------------------------------|--------------------------------|------|--------------------------------|------|--------------------------------|------|--------------------------------|------|--------------------------------|------|--------------------------------|------|--------------------------------|------|--------------------------------|------|--------------------------------|------|--------------------------------|------|
|                                   | 1                              |      | 2                              |      | 3                              |      | 4                              |      | 5                              |      | 6                              |      | 7                              |      | 8                              |      | 9                              |      | 10                             |      |
|                                   | Exposed<br>(n=2,791)<br>No Yes |      | Exposed<br>(n=2,792)<br>No Yes |      | Exposed<br>(n=2,791)<br>No Yes |      | Exposed<br>(n=2,792)<br>No Yes |      | Exposed<br>(n=2,791)<br>No Yes |      | Exposed<br>(n=2,792)<br>No Yes |      | Exposed<br>(n=2,792)<br>No Yes |      | Exposed<br>(n=2,792)<br>No Yes |      | Exposed<br>(n=2,791)<br>No Yes |      | Exposed<br>(n=2,791)<br>No Yes |      |
| Maternal age (yrs)                |                                |      |                                |      |                                |      |                                |      |                                |      |                                |      |                                |      |                                |      |                                |      |                                |      |
| 14-19                             | 0.0                            | 0.0  | 0.0                            | 0.0  | 0.0                            | 0.0  | 0.0                            | 0.0  | 0.1                            | 0.0  | 0.3                            | 0.3  | 0.0                            | 0.0  | 0.0                            | 0.0  | 0.3                            | 0.1  | 3.8                            | 5.4  |
| 20-29                             | 0.0                            | 0.0  | 0.2                            | 0.6  | 1.7                            | 4.0  | 11.6                           | 9.1  | 49.1                           | 50.5 | 71.2                           | 68.8 | 2.6                            | 4.6  | 2.6                            | 4.6  | 43.0                           | 42.0 | 96.2                           | 96.4 |
| 30-39                             | 81.5                           | 87.2 | 99.0                           | 99.4 | 97.0                           | 94.0 | 86.6                           | 89.0 | 49.4                           | 48.3 | 28.5                           | 30.9 | 97.4                           | 95.4 | 97.4                           | 95.4 | 56.8                           | 57.9 | 0.1                            | 0.2  |
| 40-49                             | 18.5                           | 12.8 | 1.2                            | 0.0  | 1.3                            | 2.0  | 1.8                            | 1.8  | 1.5                            | 1.3  | 0.0                            | 0.0  | 0.0                            | 0.0  | 0.0                            | 0.0  | 0.0                            | 0.0  | 0.0                            | 0.0  |
| Maternal BMI (kg/m <sup>2</sup> ) |                                |      |                                |      |                                |      |                                |      |                                |      |                                |      |                                |      |                                |      |                                |      |                                |      |
| <18.5                             | 3.8                            | 4.3  | 3.3                            | 2.9  | 3.6                            | 5.5  | 2.6                            | 3.2  | 2.3                            | 2.8  | 1.5                            | 1.7  | 5.7                            | 5.5  | 5.7                            | 5.5  | 5.6                            | 5.1  | 0.5                            | 0.8  |
| 18.5-24.9                         | 62.9                           | 65.0 | 66.1                           | 55.4 | 65.1                           | 55.3 | 66.4                           | 64.4 | 63.0                           | 57.7 | 59.9                           | 61.5 | 70.3                           | 71.9 | 70.3                           | 71.9 | 72.5                           | 73.0 | 65.0                           | 61.1 |
| 25.0-29.9                         | 21.1                           | 20.5 | 20.3                           | 24.6 | 21.5                           | 24.6 | 20.2                           | 23.3 | 25.1                           | 29.7 | 27.8                           | 24.1 | 16.0                           | 15.8 | 16.0                           | 15.8 | 14.3                           | 16.5 | 26.8                           | 30.1 |
| ≥30.0                             | 12.2                           | 10.3 | 10.2                           | 17.1 | 9.8                            | 14.6 | 10.8                           | 9.1  | 9.4                            | 9.8  | 10.9                           | 12.8 | 8.0                            | 6.8  | 8.0                            | 6.8  | 7.6                            | 5.4  | 7.7                            | 8.0  |
| Parity                            |                                |      |                                |      |                                |      |                                |      |                                |      |                                |      |                                |      |                                |      |                                |      |                                |      |
| 0                                 | 0.6                            | 0.0  | 1.2                            | 0.0  | 1.4                            | 2.0  | 1.9                            | 1.8  | 2.8                            | 4.7  | 28.1                           | 30.3 | 100                            | 100  | 100                            | 100  | 100                            | 100  | 100                            | 100  |
| 1                                 | 36.5                           | 34.2 | 45.9                           | 56.6 | 60.9                           | 56.3 | 71.5                           | 69.9 | 81.2                           | 79.2 | 69.0                           | 68.8 | 0.0                            | 0.0  | 0.0                            | 0.0  | 0.0                            | 0.0  | 0.0                            | 0.0  |
| 2                                 | 44.8                           | 47.9 | 41.2                           | 30.9 | 31.1                           | 35.2 | 22.8                           | 24.7 | 13.9                           | 14.5 | 2.5                            | 0.9  | 0.0                            | 0.0  | 0.0                            | 0.0  | 0.0                            | 0.0  | 0.0                            | 0.0  |
| 3                                 | 13.5                           | 11.1 | 9.7                            | 10.9 | 4.9                            | 5.5  | 2.9                            | 2.7  | 1.2                            | 0.6  | 0.0                            | 0.0  | 0.0                            | 0.0  | 0.0                            | 0.0  | 0.0                            | 0.0  | 0.0                            | 0.0  |
| 4 or more                         | 4.7                            | 6.8  | 2.2                            | 1.7  | 1.7                            | 1.0  | 1.0                            | 0.9  | 1.0                            | 1.0  | 0.3                            | 0.0  | 0.0                            | 0.0  | 0.0                            | 0.0  | 0.0                            | 0.0  | 0.0                            | 0.0  |
| Maternal education                |                                |      |                                |      |                                |      |                                |      |                                |      |                                |      |                                |      |                                |      |                                |      |                                |      |
| More than 4 years of university   | 41.3                           | 32.5 | 39.0                           | 28.0 | 37.5                           | 27.1 | 29.9                           | 24.7 | 16.3                           | 14.2 | 15.7                           | 18.4 | 50.9                           | 51.9 | 50.9                           | 51.9 | 41.4                           | 45.4 | 16.0                           | 20.6 |
| 4 year university degree          | 29.9                           | 24.8 | 36.8                           | 40.0 | 39.1                           | 35.7 | 45.0                           | 44.8 | 52.7                           | 44.8 | 42.1                           | 34.8 | 29.6                           | 30.6 | 29.6                           | 30.6 | 36.6                           | 36.2 | 48.4                           | 50.8 |
| 3 years high school               | 11.7                           | 20.5 | 10.1                           | 13.7 | 10.0                           | 13.1 | 11.3                           | 12.8 | 13.9                           | 16.7 | 14.4                           | 15.3 | 9.9                            | 9.8  | 9.9                            | 9.8  | 10.4                           | 9.9  | 15.2                           | 14.5 |
| Technical high school             | 8.0                            | 8.6  | 7.3                            | 6.9  | 6.1                            | 10.1 | 8.4                            | 10.5 | 11.5                           | 15.8 | 21.0                           | 23.0 | 4.3                            | 3.8  | 4.3                            | 3.8  | 4.5                            | 4.0  | 10.5                           | 7.5  |
| 1-2 years high school             | 4.9                            | 9.4  | 3.5                            | 6.9  | 3.7                            | 8.0  | 3.0                            | 3.7  | 3.0                            | 5.4  | 4.1                            | 5.1  | 2.1                            | 0.8  | 2.1                            | 0.8  | 2.8                            | 1.3  | 4.5                            | 2.0  |
| 9-year secondary                  | 2.7                            | 4.3  | 2.3                            | 4.0  | 2.1                            | 4.0  | 1.4                            | 1.4  | 1.5                            | 2.2  | 1.7                            | 1.7  | 1.5                            | 1.6  | 1.5                            | 1.6  | 2.0                            | 1.5  | 3.9                            | 2.8  |
| Other                             | 1.6                            | 0.0  | 1.1                            | 0.6  | 1.4                            | 2.0  | 1.1                            | 2.3  | 1.1                            | 1.0  | 0.9                            | 1.7  | 1.7                            | 1.6  | 1.7                            | 1.6  | 2.3                            | 1.8  | 1.6                            | 2.0  |
| Maternal smoking (at 17 weeks)    |                                |      |                                |      |                                |      |                                |      |                                |      |                                |      |                                |      |                                |      |                                |      |                                |      |
| None                              | 84.0                           | 78.6 | 85.5                           | 79.4 | 84.8                           | 75.4 | 84.1                           | 79.0 | 81.7                           | 78.2 | 76.9                           | 72.2 | 80.0                           | 84.2 | 80.0                           | 84.2 | 79.2                           | 81.7 | 66.6                           | 66.2 |
| Quit                              | 9.6                            | 16.2 | 9.6                            | 12.6 | 10.5                           | 14.6 | 10.9                           | 12.8 | 12.6                           | 15.8 | 15.3                           | 17.3 | 15.5                           | 12.5 | 15.5                           | 12.5 | 16.7                           | 14.1 | 22.6                           | 23.5 |
| Daily                             | 0.9                            | 1.7  | 0.8                            | 1.7  | 1.2                            | 1.0  | 0.9                            | 0.5  | 1.7                            | 1.3  | 2.1                            | 2.8  | 0.7                            | 1.3  | 0.7                            | 1.3  | 0.9                            | 1.5  | 3.3                            | 2.5  |
| Sometimes                         | 5.6                            | 3.4  | 4.1                            | 6.3  | 3.6                            | 9.1  | 4.1                            | 7.8  | 4.0                            | 4.7  | 5.7                            | 7.6  | 3.8                            | 2.1  | 3.8                            | 2.1  | 3.2                            | 2.8  | 7.9                            | 7.4  |

**Table S2.** Hormonal contraceptive use and weight for gestational age at birth by period of last use relative to conception, progestin type, and route of administration

| Exposure              | Small for gestational age (SGA) |         |                   |                           | Birthweight z-score         |                                        |
|-----------------------|---------------------------------|---------|-------------------|---------------------------|-----------------------------|----------------------------------------|
|                       | Exposed (n)                     | SGA (n) | OR (95% CI)       | aOR <sup>a</sup> (95% CI) | $\beta$ (95% CI) unadjusted | $\beta$ (95% CI) adjusted <sup>a</sup> |
| None                  | 23,421                          | 605     | referent          | referent                  | referent                    | referent                               |
| 0 - 12 weeks after    |                                 |         |                   |                           |                             |                                        |
| Combination OC        | 1,062                           | 42      | 1.55 (1.14, 2.13) | 1.10 (0.78, 1.55)         | 0.20 (0.14, 0.27)           | 0.02 (-0.05, 0.09)                     |
| Other <sup>b</sup>    | 576                             | 15      | 1.01 (0.60, 1.69) | 1.02 (0.60, 1.73)         | 0.07 (-0.02, 0.17)          | 0.08 (0.01, 0.18)                      |
| 1 - >0 months before  |                                 |         |                   |                           |                             |                                        |
| Combination OC        | 4,660                           | 142     | 1.19 (0.98, 1.43) | 0.96 (0.80, 1.17)         | 0.15 (0.12, 0.19)           | 0.01 (-0.03, 0.04)                     |
| Progestin only OC     | 1,204                           | 14      | 0.44 (0.26, 0.76) | 0.57 (0.33, 0.97)         | -0.09 (-0.16, -0.03)        | -0.03 (-0.09, 0.03)                    |
| Vaginal ring          | 356                             | 11      | 1.20 (0.66, 2.20) | 0.99 (0.54, 1.81)         | 0.07 (-0.05, 0.18)          | -0.09 (-0.20, 0.03)                    |
| Other <sup>b</sup>    | 245                             | 3       | 0.47 (0.15, 1.46) | 0.40 (0.13, 1.27)         | 0.09 (-0.05, 0.22)          | -0.001 (-0.13, 0.13)                   |
| 4 - >1 month before   |                                 |         |                   |                           |                             |                                        |
| Combination OC        | 3,833                           | 103     | 1.04 (0.84, 1.29) | 0.82 (0.66, 1.02)         | 0.11 (0.07, 0.15)           | -0.05 (-0.08, 0.01)                    |
| Progestin only OC     | 1,284                           | 11      | 0.33 (0.18, 0.59) | 0.41 (0.22, 0.75)         | -0.10 (-0.16, -0.04)        | -0.03 (-0.09, 0.03)                    |
| Vaginal ring          | 352                             | 16      | 1.80 (1.08, 2.98) | 1.48 (0.88, 2.49)         | 0.15 (0.03, 0.28)           | 0.01 (-0.11, 0.14)                     |
| Other <sup>b</sup>    | 271                             | 6       | 0.85 (0.38, 1.93) | 0.73 (0.32, 1.68)         | 0.08 (-0.06, 0.21)          | 0.004 (-0.14, 0.13)                    |
| 12 - >4 months before |                                 |         |                   |                           |                             |                                        |
| Combination OC        | 4,633                           | 147     | 1.24 (1.03, 1.48) | 0.95 (0.79, 1.15)         | 0.12 (0.08, 0.15)           | -0.05 (-0.09, -0.01)                   |
| Progestin only OC     | 1,795                           | 33      | 0.71 (0.50, 1.01) | 0.95 (0.66, 1.36)         | -0.08 (-0.13, -0.03)        | 0.01 (-0.04, 0.06)                     |
| Vaginal ring          | 424                             | 10      | 0.91 (0.48, 1.71) | 0.76 (0.40, 1.42)         | 0.07 (-0.03, 0.17)          | -0.06 (-0.16, 0.03)                    |
| Other <sup>b</sup>    | 618                             | 9       | 0.56 (0.29, 1.08) | 0.52 (0.26, 1.01)         | 0.01 (-0.08, 0.10)          | -0.02 (-0.11, 0.06)                    |

<sup>a</sup>adjusted for parity, maternal education, maternal pre-pregnancy BMI, maternal smoking, and maternal age at birth

<sup>b</sup>hormonal contraceptive types with <10 exposed cases collapsed into a single "other" category

**Table S3.** Hormonal contraceptive use and small for gestational age by period of last use relative to conception, progestin type, and route of administration

| Exposure                         | Exposed (n) | SGA (n) | OR (95% CI)       | aOR <sup>a</sup> (95% CI) |
|----------------------------------|-------------|---------|-------------------|---------------------------|
| None                             | 23,421      | 605     | referent          | referent                  |
| <i>0 - 12 weeks after</i>        |             |         |                   |                           |
| Combination OC                   |             |         |                   |                           |
| drospirenone and EE              | 368         | 16      | 1.71 (1.03, 2.05) | 1.24 (0.74, 2.08)         |
| levonorgestrel and EE            | 545         | 19      | 1.36 (0.86, 2.17) | 0.96 (0.59, 1.56)         |
| Other <sup>b</sup>               | 725         | 22      | 1.18 (0.77, 1.82) | 1.08 (0.69, 1.69)         |
| <i>1 - &gt;0 months before</i>   |             |         |                   |                           |
| Combination OC                   |             |         |                   |                           |
| desogestrel and EE               | 295         | 10      | 1.32 (0.70, 2.50) | 1.12 (0.59, 2.12)         |
| drospirenone and EE              | 1,472       | 36      | 0.95 (0.67, 1.33) | 0.75 (0.53, 1.05)         |
| levonorgestrel and EE            | 2,521       | 82      | 1.27 (1.00, 1.60) | 1.04 (0.82, 1.32)         |
| norethisterone and EE            | 372         | 14      | 1.47 (0.86, 2.53) | 1.24 (0.72, 2.13)         |
| Vaginal ring                     |             |         |                   |                           |
| etonogestrel and EE              | 356         | 11      | 1.20 (0.66, 2.20) | 0.99 (0.54, 1.81)         |
| Other <sup>b</sup>               | 1,449       | 17      | 0.45 (0.28, 0.73) | 0.53 (0.32, 0.86)         |
| <i>4 - &gt; 1 month before</i>   |             |         |                   |                           |
| Combination OC                   |             |         |                   |                           |
| drospirenone and EE              | 1,227       | 35      | 1.11 (0.78, 1.56) | 0.88 (0.62, 1.25)         |
| levonorgestrel and EE            | 2,107       | 61      | 1.12 (0.86, 1.47) | 0.89 (0.68, 1.17)         |
| Vaginal ring                     |             |         |                   |                           |
| etonogestrel and EE              | 352         | 16      | 1.80 (1.08, 2.98) | 1.48 (0.88, 2.49)         |
| Other <sup>b</sup>               | 2,054       | 24      | 0.45 (0.30, 0.67) | 0.46 (0.31, 0.70)         |
| <i>12 - &gt; 4 months before</i> |             |         |                   |                           |
| Combination OC                   |             |         |                   |                           |
| desogestrel and EE               | 215         | 12      | 2.23 (1.24, 4.01) | 1.73 (0.96, 3.12)         |
| drospirenone and EE              | 1,475       | 43      | 1.13 (0.83, 1.55) | 0.87 (0.63, 1.19)         |
| levonorgestrel and EE            | 2,605       | 82      | 1.23 (0.97, 1.55) | 0.95 (0.74, 1.21)         |
| norethisterone and EE            | 338         | 10      | 1.15 (0.61, 2.17) | 0.89 (0.47, 1.68)         |
| Progestin only OC                |             |         |                   |                           |
| desogestrel                      | 1,031       | 18      | 0.67 (0.42, 1.08) | 0.88 (0.55, 1.42)         |
| norethisterone                   | 640         | 12      | 0.72 (0.40, 1.28) | 1.01 (0.56, 1.81)         |
| Vaginal ring                     |             |         |                   |                           |
| etonogestrel and EE              | 424         | 10      | 0.91 (0.48, 1.71) | 0.76 (0.40, 1.42)         |
| Other <sup>b</sup>               | 742         | 12      | 0.62 (0.35, 1.10) | 0.61 (0.34, 1.08)         |

<sup>a</sup> adjusted for parity, maternal education, maternal pre-pregnancy BMI, maternal smoking, and maternal age at birth

<sup>b</sup> hormonal contraceptive types with <10 exposed cases collapsed into a single "other" category

**Table S4.** Sensitivity analysis for combination oral contraceptive use and preterm birth with restriction to nulliparous pregnancies

|                      | 0 - 12 weeks after<br>conception<br>(n=9,761) | 1 - >0 months<br>before<br>conception<br>(n=12,565) | 4 - > 1 month<br>before<br>conception<br>(n=12,127) | 12 - >4 months<br>before<br>conception<br>(n=12,990) |
|----------------------|-----------------------------------------------|-----------------------------------------------------|-----------------------------------------------------|------------------------------------------------------|
| Exposure             | aOR <sup>a</sup> (95% CI)                     | aOR <sup>a</sup> (95% CI)                           | aOR <sup>a</sup> (95% CI)                           | aOR <sup>a</sup> (95% CI)                            |
| None                 | referent                                      | referent                                            | referent                                            | referent                                             |
| Combination OC       | 1.39 (1.02, 1.90)                             | 1.22 (1.02, 1.47)                                   | 1.39 (1.15, 1.68)                                   | 1.16 (0.97, 1.39)                                    |
| Progestin only<br>OC | 2.21 (1.03, 4.73)                             | 0.80 (0.41, 1.56)                                   | 1.26 (0.71, 2.23)                                   | 1.18 (0.68, 2.04)                                    |
| Vaginal ring         | <sup>c</sup>                                  | 0.53 (0.24, 1.21)                                   | 0.82 (0.42, 1.62)                                   | 0.63 (0.31, 1.27)                                    |
| Transdermal          | <sup>c</sup>                                  | <sup>c</sup>                                        | <sup>c</sup>                                        | 0.73 (0.32, 1.67)                                    |
| Injectable           | <sup>c</sup>                                  | <sup>c</sup>                                        | <sup>c</sup>                                        | 1.97 (0.89, 4.35)                                    |
| Other <sup>b</sup>   | 0.49 (0.15, 1.59)                             | 0.49 (0.15, 1.55)                                   | 0.71 (0.29, 1.74)                                   | <sup>c</sup>                                         |

<sup>a</sup> adjusted for maternal education, maternal pre-pregnancy BMI, maternal smoking, and maternal age at birth

<sup>b</sup> hormonal contraceptive types with <10 exposed cases collapsed into a single "other" category

<sup>c</sup> too few to estimate association

**Table S5.** Sensitivity analysis for combination oral contraceptive and preterm birth with vaginal ring users as the comparator group

| Exposure       | 1 - >0 months before<br>(n=5,099) |                           | 4 – >1 month before<br>(n=4,185) |                           | 12 - >4 months before<br>(n=5,057) |                           |
|----------------|-----------------------------------|---------------------------|----------------------------------|---------------------------|------------------------------------|---------------------------|
|                | OR (95% CI)                       | aOR <sup>a</sup> (95% CI) | OR (95% CI)                      | aOR <sup>a</sup> (95% CI) | OR (95% CI)                        | aOR <sup>a</sup> (95% CI) |
| Vaginal ring   | referent                          | referent                  | referent                         | referent                  | referent                           | referent                  |
| Combination OC | 1.54 (0.89, 2.67)                 | 1.55 (0.89, 2.71)         | 1.67 (0.92, 3.01)                | 1.72 (0.94, 3.15)         | 1.88 (1.05, 3.39)                  | 1.78 (0.99, 3.21)         |

<sup>a</sup>adjusted for parity, maternal education, maternal pre-pregnancy BMI, maternal smoking, and maternal age at birth

**Table S6.** Sensitivity analysis for hormonal oral contraceptive use and preterm birth with restriction to unplanned pregnancies

| 0 - 12 weeks after conception<br>(n=8,753) |                           |
|--------------------------------------------|---------------------------|
| Exposure                                   | aOR <sup>a</sup> (95% CI) |
| None                                       | referent                  |
| Combination OC                             | 1.22 (0.91, 1.63)         |
| Progestin only OC                          | 1.08 (0.65, 1.78)         |
| None                                       | referent                  |
| Combination OC                             | <sup>c</sup>              |
| drospirenone and EE                        | 1.08 (0.68, 1.72)         |
| levonorgestrel and EE                      | 1.11 (0.75, 1.65)         |
| norethisterone and EE                      | 3.00 (1.53, 5.83)         |
| Progestin only OC                          |                           |
| norethiserone                              | 1.69 (0.89, 3.19)         |

<sup>a</sup> adjusted for maternal education, maternal pre-pregnancy BMI, maternal smoking, parity, and maternal age at birth

**Table S7.** Sensitivity analysis for association between combination oral contraceptive use and preterm birth with propensity score analysis approach<sup>a</sup>

|                | 0 - 12 weeks<br>after<br>(n=24,318) <sup>b</sup> | 1 - >0 months<br>before<br>(n=27,978) <sup>b</sup> | 4 - >1 month<br>before<br>(n=27,242) <sup>b</sup> | 12 - >4 months<br>before<br>(n=27,915) <sup>b</sup> |
|----------------|--------------------------------------------------|----------------------------------------------------|---------------------------------------------------|-----------------------------------------------------|
| Exposure       | aOR <sup>a</sup> (95% CI)                        | aOR <sup>a</sup> (95% CI)                          | aOR <sup>a</sup> (95% CI)                         | aOR <sup>a</sup> (95% CI)                           |
| None           | referent                                         | referent                                           | referent                                          | referent                                            |
| Combination OC | 1.35 (1.02, 1.77)                                | 1.17 (1.00, 1.37)                                  | 1.34 (1.14, 1.57)                                 | 1.24 (1.06, 1.45)                                   |

<sup>a</sup>doubly robust approach with generalized estimation equation models including both the predicted probability of combination oral contraceptive use (modeled as an indicator variable for decile rank) and with adjustment for parity, maternal education, maternal pre-pregnancy BMI, maternal smoking, and maternal age at birth

<sup>b</sup>study population after trimming for non-positivity
